# Supplementary material
Source: Springer Nature journal article supplement (https://www.springermedizin.de/resource/supplementary/12963_2011_151_MOESM8_ESM.pdf/9572764)

|         | Cause 2 | Cause 3 | Cause 4 | Cause 5 | Cause 6 |
|---------|---------|---------|---------|---------|---------|
| Cause 1 |         |         |         |         |         |
| Cause 2 |         |         |         |         |         |
| Cause 3 |         |         |         |         |         |
| Cause 4 |         |         |         |         |         |
| Cause 5 |         |         |         |         |         |

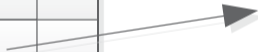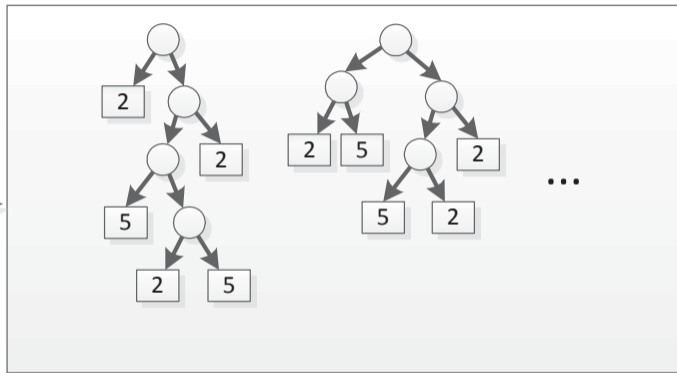

Supplement: MOESM8 [file 9572764]
